# Supplementary material
Source: publisher figshare collection journal article supplement (https://acs.figshare.com/ndownloader/files/3747964)
Supplement: Supplementary file 1 [file 3747964]

Compound	SMILES	POP Ki (µM)
9a	[H][C@]1(CN2NC(OCC3=CC=CC=C3)=O)[C@]([C@H](C#N)CC=C1)([H])C2=O	>150
7a	[H][C@]1(CN2NC(OCC3=CC=CC=C3)=O)[C@]([C@H](C(N4[C@H](C#N)CCC4)=O)CC=C1)([H])C2=O	1.5 ± 0.1
7b	[H][C@]1(CN2NC(OCC3=CC=CC=C3)=O)[C@]([C@H](C(N4[C@H](C#N)CCC4)=O)[C@@H](C)C=C1)([H])C2=O	62.5 ± 10
7c	[H][C@]1(CN2NC(CC3=CC=CC=C3)=O)[C@]([C@H](C(N4[C@H](C#N)CCC4)=O)CC=C1)([H])C2=O	4 ± 0.45
7d	[H][C@]1(CN2OCC3=CC=CC=C3)[C@]([C@H](C(N4[C@H](C#N)CCC4)=O)CC=C1)([H])C2=O	0.01 ± 0.001
7e	[H][C@]1(CN2CC3=CC=CC=C3)[C@]([C@H](C(N4[C@H](C#N)CCC4)=O)CC=C1)([H])C2=O	0.001 ± 0.00005
7f	[H][C@]1(CN2CC3=CC=CC=C3)[C@]([C@H](C(N4[C@H](C#N)CCC4)=O)[C@@H](C)C=C1)([H])C2=O	0.046 ± 0.0025
12a	C=C/C=C/CNNC(OCC1=CC=CC=C1)=O
12b	C/C=C/C=C/CNNC(OCC1=CC=CC=C1)=O
12c	C=C/C=C/CNNC(CC1=CC=CC=C1)=O
12d	C=C/C=C/CNOCC1=CC=CC=C1
13a	[H][C@]1(CN2NC(OCC3=CC=CC=C3)=O)[C@]([C@H](C(O)=O)CC=C1)([H])C2=O
13b	[H][C@]1(CN2NC(OCC3=CC=CC=C3)=O)[C@]([C@H](C(O)=O)[C@@H](C)C=C1)([H])C2=O
13c	[H][C@]1(CN2NC(CC3=CC=CC=C3)=O)[C@]([C@H](C(O)=O)CC=C1)([H])C2=O
13d	[H][C@]1(CN2OCC3=CC=CC=C3)[C@]([C@H](C(O)=O)CC=C1)([H])C2=O
13e	[H][C@]1(CN2CC3=CC=CC=C3)[C@]([C@H](C(O)=O)CC=C1)([H])C2=O
13f	[H][C@]1(CN2CC3=CC=CC=C3)[C@]([C@H](C(O)=O)[C@@H](C)C=C1)([H])C2=O
14c	[H][C@]1(CN2NC(CC3=CC=CC=C3)=O)[C@@]([C@@H](C(O)=O)CC=C1)([H])C2=O
15a	[H][C@]1(CN2NC(OCC3=CC=CC=C3)=O)[C@]([C@H](C(N4CCCC4)=O)CC=C1)([H])C2=O	12 ± 1
15b	[H][C@]1(CN2NC(OCC3=CC=CC=C3)=O)[C@]([C@H](C(N4CCCC4)=O)[C@@H](C)C=C1)([H])C2=O	67 ± 5
15c	[H][C@]1(CN2NC(CC3=CC=CC=C3)=O)[C@]([C@H](C(N4CCCC4)=O)CC=C1)([H])C2=O	65 ± 12.5
15d	[H][C@]1(CN2OCC3=CC=CC=C3)[C@]([C@H](C(N4CCCC4)=O)CC=C1)([H])C2=O	7.5 ± 1.5
15e	[H][C@]1(CN2CC3=CC=CC=C3)[C@]([C@H](C(N4CCCC4)=O)CC=C1)([H])C2=O	0.0325 ± 0.0025
15f	[H][C@]1(CN2CC3=CC=CC=C3)[C@]([C@H](C(N4CCCC4)=O)[C@@H](C)C=C1)([H])C2=O	1 ± 0.05
16a	[H][C@@]1(CN2NC(OCC3=CC=CC=C3)=O)[C@@]([C@@H](C(N4[C@H](C#N)CCC4)=O)CC=C1)([H])C2=O	80 ± 5
16b	[H][C@@]1(CN2NC(OCC3=CC=CC=C3)=O)[C@@]([C@@H](C(N4[C@H](C#N)CCC4)=O)[C@H](C)C=C1)([H])C2=O	>150
16c	[H][C@@]1(CN2NC(CC3=CC=CC=C3)=O)[C@@]([C@@H](C(N4[C@H](C#N)CCC4)=O)CC=C1)([H])C2=O	>150
16d	[H][C@@]1(CN2OCC3=CC=CC=C3)[C@@]([C@@H](C(N4[C@H](C#N)CCC4)=O)CC=C1)([H])C2=O	>150
16e	[H][C@@]1(CN2CC3=CC=CC=C3)[C@@]([C@@H](C(N4[C@H](C#N)CCC4)=O)CC=C1)([H])C2=O	2.1 ± 0.15
16f	[H][C@@]1(CN2CC3=CC=CC=C3)[C@@]([C@@H](C(N4[C@H](C#N)CCC4)=O)[C@H](C)C=C1)([H])C2=O	62 ± 15
